# Supplementary material for: Comprehensive analysis of early fractional anisotropy changes in acute ischemic stroke
Source: PubMed Central journal article supplement (PMC5708650; doi:10.1371/journal.pone.0188318), 2017-11-30
Supplement: pone.0188318.s001.pdf [file pone.0188318.s001.pdf]

| patient | parameter | gender (male=1, female=2) | age |
|---------|-----------|---------------------------|-----|
| 9       | FA        | 1                         | 68  |
| 9       | L1        |                           |     |
| 9       | L2        |                           |     |
| 9       | L3        |                           |     |
| 9       | MD        |                           |     |
| 9       | S0        |                           |     |
| 9       | rad.diff. |                           |     |
| 13      | FA        | 2                         | 43  |
| 13      | L1        |                           |     |
| 13      | L2        |                           |     |
| 13      | L3        |                           |     |
| 13      | MD        |                           |     |
| 13      | S0        |                           |     |
| 13      | rad.diff. |                           |     |
| 29      | FA        | 1                         | 86  |
| 29      | L1        |                           |     |
| 29      | L2        |                           |     |
| 29      | L3        |                           |     |
| 29      | MD        |                           |     |
| 29      | S0        |                           |     |
| 29      | rad.diff. |                           |     |
| 43      | FA        | 1                         | 66  |
| 43      | L1        |                           |     |
| 43      | L2        |                           |     |
| 43      | L3        |                           |     |
| 43      | MD        |                           |     |
| 43      | S0        |                           |     |
| 43      | rad.diff. |                           |     |
| 44      | FA        | 1                         | 84  |
| 44      | L1        |                           |     |
| 44      | L2        |                           |     |
| 44      | L3        |                           |     |
| 44      | MD        |                           |     |
| 44      | S0        |                           |     |
| 44      | rad.diff. |                           |     |
| 45      | FA        | 1                         | 57  |
| 45      | L1        |                           |     |
| 45      | L2        |                           |     |
| 45      | L3        |                           |     |
| 45      | MD        |                           |     |
| 45      | S0        |                           |     |
| 45      | rad.diff. |                           |     |
| 48      | FA        | 1                         | 70  |
| 48      | L1        |                           |     |
| 48      | L2        |                           |     |
| 48      | L3        |                           |     |
| 48      | MD        |                           |     |
| 48      | S0        |                           |     |
| 48      | rad.diff. |                           |     |

|     |           |   |    |
|-----|-----------|---|----|
| 62  | FA        | 1 | 80 |
| 62  | L1        |   |    |
| 62  | L2        |   |    |
| 62  | L3        |   |    |
| 62  | MD        |   |    |
| 62  | S0        |   |    |
| 62  | rad.diff. |   |    |
| 74  | FA        | 2 | 80 |
| 74  | L1        |   |    |
| 74  | L2        |   |    |
| 74  | L3        |   |    |
| 74  | MD        |   |    |
| 74  | S0        |   |    |
| 74  | rad.diff. |   |    |
| 108 | FA        | 2 | 36 |
| 108 | L1        |   |    |
| 108 | L2        |   |    |
| 108 | L3        |   |    |
| 108 | MD        |   |    |
| 108 | S0        |   |    |
| 108 | rad.diff. |   |    |
| 109 | FA        | 2 | 79 |
| 109 | L1        |   |    |
| 109 | L2        |   |    |
| 109 | L3        |   |    |
| 109 | MD        |   |    |
| 109 | S0        |   |    |
| 109 | rad.diff. |   |    |
| 110 | FA        | 1 | 55 |
| 110 | L1        |   |    |
| 110 | L2        |   |    |
| 110 | L3        |   |    |
| 110 | MD        |   |    |
| 110 | S0        |   |    |
| 110 | rad.diff. |   |    |
| 140 | FA        | 2 | 43 |
| 140 | L1        |   |    |
| 140 | L2        |   |    |
| 140 | L3        |   |    |
| 140 | MD        |   |    |
| 140 | S0        |   |    |
| 140 | rad.diff. |   |    |
| 149 | FA        | 2 | 35 |
| 149 | L1        |   |    |
| 149 | L2        |   |    |
| 149 | L3        |   |    |
| 149 | MD        |   |    |
| 149 | S0        |   |    |
| 149 | rad.diff. |   |    |
| 153 | FA        | 1 | 66 |

|     |           |   |    |
|-----|-----------|---|----|
| 153 | L1        |   |    |
| 153 | L2        |   |    |
| 153 | L3        |   |    |
| 153 | MD        |   |    |
| 153 | S0        |   |    |
| 153 | rad.diff. |   |    |
| 170 | FA        | 1 | 74 |
| 170 | L1        |   |    |
| 170 | L2        |   |    |
| 170 | L3        |   |    |
| 170 | MD        |   |    |
| 170 | S0        |   |    |
| 170 | rad.diff. |   |    |
| 171 | FA        | 2 | 47 |
| 171 | L1        |   |    |
| 171 | L2        |   |    |
| 171 | L3        |   |    |
| 171 | MD        |   |    |
| 171 | S0        |   |    |
| 171 | rad.diff. |   |    |
| 187 | FA        | 2 | 60 |
| 187 | L1        |   |    |
| 187 | L2        |   |    |
| 187 | L3        |   |    |
| 187 | MD        |   |    |
| 187 | S0        |   |    |
| 187 | rad.diff. |   |    |
| 190 | FA        | 2 | 66 |
| 190 | L1        |   |    |
| 190 | L2        |   |    |
| 190 | L3        |   |    |
| 190 | MD        |   |    |
| 190 | S0        |   |    |
| 190 | rad.diff. |   |    |
| 193 | FA        | 1 | 74 |
| 193 | L1        |   |    |
| 193 | L2        |   |    |
| 193 | L3        |   |    |
| 193 | MD        |   |    |
| 193 | S0        |   |    |
| 193 | rad.diff. |   |    |
| 194 | FA        | 1 | 62 |
| 194 | L1        |   |    |
| 194 | L2        |   |    |
| 194 | L3        |   |    |
| 194 | MD        |   |    |
| 194 | S0        |   |    |
| 194 | rad.diff. |   |    |
| 195 | FA        | 2 | 74 |
| 195 | L1        |   |    |

|     |           |   |    |
|-----|-----------|---|----|
| 195 | L2        |   |    |
| 195 | L3        |   |    |
| 195 | MD        |   |    |
| 195 | S0        |   |    |
| 195 | rad.diff. |   |    |
| 198 | FA        | 2 | 79 |
| 198 | L1        |   |    |
| 198 | L2        |   |    |
| 198 | L3        |   |    |
| 198 | MD        |   |    |
| 198 | S0        |   |    |
| 198 | rad.diff. |   |    |
| 199 | FA        | 2 | 77 |
| 199 | L1        |   |    |
| 199 | L2        |   |    |
| 199 | L3        |   |    |
| 199 | MD        |   |    |
| 199 | S0        |   |    |
| 199 | rad.diff. |   |    |
| 236 | FA        | 1 | 75 |
| 236 | L1        |   |    |
| 236 | L2        |   |    |
| 236 | L3        |   |    |
| 236 | MD        |   |    |
| 236 | S0        |   |    |
| 236 | rad.diff. |   |    |
| 249 | FA        | 1 | 67 |
| 249 | L1        |   |    |
| 249 | L2        |   |    |
| 249 | L3        |   |    |
| 249 | MD        |   |    |
| 249 | S0        |   |    |
| 249 | rad.diff. |   |    |
| 254 | FA        | 1 | 73 |
| 254 | L1        |   |    |
| 254 | L2        |   |    |
| 254 | L3        |   |    |
| 254 | MD        |   |    |
| 254 | S0        |   |    |
| 254 | rad.diff. |   |    |
| 255 | FA        | 1 | 72 |
| 255 | L1        |   |    |
| 255 | L2        |   |    |
| 255 | L3        |   |    |
| 255 | MD        |   |    |
| 255 | S0        |   |    |
| 255 | rad.diff. |   |    |
| 904 | FA        | 2 | 74 |
| 904 | L1        |   |    |
| 904 | L2        |   |    |

|     |           |   |    |
|-----|-----------|---|----|
| 904 | L3        |   |    |
| 904 | MD        |   |    |
| 904 | S0        |   |    |
| 904 | rad.diff. |   |    |
| 905 | FA        | 2 | 51 |
| 905 | L1        |   |    |
| 905 | L2        |   |    |
| 905 | L3        |   |    |
| 905 | MD        |   |    |
| 905 | S0        |   |    |
| 905 | rad.diff. |   |    |
| 907 | FA        | 2 | 69 |
| 907 | L1        |   |    |
| 907 | L2        |   |    |
| 907 | L3        |   |    |
| 907 | MD        |   |    |
| 907 | S0        |   |    |
| 907 | rad.diff. |   |    |
| 908 | FA        | 1 | 44 |
| 908 | L1        |   |    |
| 908 | L2        |   |    |
| 908 | L3        |   |    |
| 908 | MD        |   |    |
| 908 | S0        |   |    |
| 908 | rad.diff. |   |    |
| 910 | FA        | 1 | 67 |
| 910 | L1        |   |    |
| 910 | L2        |   |    |
| 910 | L3        |   |    |
| 910 | MD        |   |    |
| 910 | S0        |   |    |
| 910 | rad.diff. |   |    |
| 911 | FA        | 1 | 71 |
| 911 | L1        |   |    |
| 911 | L2        |   |    |
| 911 | L3        |   |    |
| 911 | MD        |   |    |
| 911 | S0        |   |    |
| 911 | rad.diff. |   |    |
| 912 | FA        | 1 | 82 |
| 912 | L1        |   |    |
| 912 | L2        |   |    |
| 912 | L3        |   |    |
| 912 | MD        |   |    |
| 912 | S0        |   |    |
| 912 | rad.diff. |   |    |
| 915 | FA        | 1 | 77 |
| 915 | L1        |   |    |
| 915 | L2        |   |    |
| 915 | L3        |   |    |

|     |           |   |    |
|-----|-----------|---|----|
| 915 | MD        |   |    |
| 915 | S0        |   |    |
| 915 | rad.diff. |   |    |
| 916 | FA        | 2 | 48 |
| 916 | L1        |   |    |
| 916 | L2        |   |    |
| 916 | L3        |   |    |
| 916 | MD        |   |    |
| 916 | S0        |   |    |
| 916 | rad.diff. |   |    |
| 917 | FA        | 1 | 78 |
| 917 | L1        |   |    |
| 917 | L2        |   |    |
| 917 | L3        |   |    |
| 917 | MD        |   |    |
| 917 | S0        |   |    |
| 917 | rad.diff. |   |    |
| 918 | FA        | 2 | 92 |
| 918 | L1        |   |    |
| 918 | L2        |   |    |
| 918 | L3        |   |    |
| 918 | MD        |   |    |
| 918 | S0        |   |    |
| 918 | rad.diff. |   |    |
| 919 | FA        | 1 | 62 |
| 919 | L1        |   |    |
| 919 | L2        |   |    |
| 919 | L3        |   |    |
| 919 | MD        |   |    |
| 919 | S0        |   |    |
| 919 | rad.diff. |   |    |
| 922 | FA        | 1 | 78 |
| 922 | L1        |   |    |
| 922 | L2        |   |    |
| 922 | L3        |   |    |
| 922 | MD        |   |    |
| 922 | S0        |   |    |
| 922 | rad.diff. |   |    |
| 925 | FA        | 2 | 60 |
| 925 | L1        |   |    |
| 925 | L2        |   |    |
| 925 | L3        |   |    |
| 925 | MD        |   |    |
| 925 | S0        |   |    |
| 925 | rad.diff. |   |    |
| 927 | FA        | 1 | 78 |
| 927 | L1        |   |    |
| 927 | L2        |   |    |
| 927 | L3        |   |    |
| 927 | MD        |   |    |

|     |           |   |    |
|-----|-----------|---|----|
| 927 | S0        |   |    |
| 927 | rad.diff. |   |    |
| 928 | FA        | 1 | 68 |
| 928 | L1        |   |    |
| 928 | L2        |   |    |
| 928 | L3        |   |    |
| 928 | MD        |   |    |
| 928 | S0        |   |    |
| 928 | rad.diff. |   |    |
| 929 | FA        | 2 | 78 |
| 929 | L1        |   |    |
| 929 | L2        |   |    |
| 929 | L3        |   |    |
| 929 | MD        |   |    |
| 929 | S0        |   |    |
| 929 | rad.diff. |   |    |
| 930 | FA        | 2 | 83 |
| 930 | L1        |   |    |
| 930 | L2        |   |    |
| 930 | L3        |   |    |
| 930 | MD        |   |    |
| 930 | S0        |   |    |
| 930 | rad.diff. |   |    |
| 931 | FA        | 1 | 80 |
| 931 | L1        |   |    |
| 931 | L2        |   |    |
| 931 | L3        |   |    |
| 931 | MD        |   |    |
| 931 | S0        |   |    |
| 931 | rad.diff. |   |    |
| 933 | FA        | 1 | 61 |
| 933 | L1        |   |    |
| 933 | L2        |   |    |
| 933 | L3        |   |    |
| 933 | MD        |   |    |
| 933 | S0        |   |    |
| 933 | rad.diff. |   |    |
| 934 | FA        | 2 | 47 |
| 934 | L1        |   |    |
| 934 | L2        |   |    |
| 934 | L3        |   |    |
| 934 | MD        |   |    |
| 934 | S0        |   |    |
| 934 | rad.diff. |   |    |
| 937 | FA        | 2 | 65 |
| 937 | L1        |   |    |
| 937 | L2        |   |    |
| 937 | L3        |   |    |
| 937 | MD        |   |    |
| 937 | S0        |   |    |

|     |           |   |    |
|-----|-----------|---|----|
| 937 | rad.diff. |   |    |
| 938 | FA        | 2 | 89 |
| 938 | L1        |   |    |
| 938 | L2        |   |    |
| 938 | L3        |   |    |
| 938 | MD        |   |    |
| 938 | S0        |   |    |
| 938 | rad.diff. |   |    |
| 939 | FA        | 1 | 71 |
| 939 | L1        |   |    |
| 939 | L2        |   |    |
| 939 | L3        |   |    |
| 939 | MD        |   |    |
| 939 | S0        |   |    |
| 939 | rad.diff. |   |    |
| 940 | FA        | 2 | 73 |
| 940 | L1        |   |    |
| 940 | L2        |   |    |
| 940 | L3        |   |    |
| 940 | MD        |   |    |
| 940 | S0        |   |    |
| 940 | rad.diff. |   |    |
| 941 | FA        | 2 | 60 |
| 941 | L1        |   |    |
| 941 | L2        |   |    |
| 941 | L3        |   |    |
| 941 | MD        |   |    |
| 941 | S0        |   |    |
| 941 | rad.diff. |   |    |
| 942 | FA        | 2 | 58 |
| 942 | L1        |   |    |
| 942 | L2        |   |    |
| 942 | L3        |   |    |
| 942 | MD        |   |    |
| 942 | S0        |   |    |
| 942 | rad.diff. |   |    |
| 943 | FA        | 2 | 84 |
| 943 | L1        |   |    |
| 943 | L2        |   |    |
| 943 | L3        |   |    |
| 943 | MD        |   |    |
| 943 | S0        |   |    |
| 943 | rad.diff. |   |    |
| 946 | FA        | 1 | 43 |
| 946 | L1        |   |    |
| 946 | L2        |   |    |
| 946 | L3        |   |    |
| 946 | MD        |   |    |
| 946 | S0        |   |    |
| 946 | rad.diff. |   |    |



|     |           |   |    |
|-----|-----------|---|----|
| 947 | FA        | 2 | 78 |
| 947 | L1        |   |    |
| 947 | L2        |   |    |
| 947 | L3        |   |    |
| 947 | MD        |   |    |
| 947 | S0        |   |    |
| 947 | rad.diff. |   |    |
| 949 | FA        | 1 | 82 |
| 949 | L1        |   |    |
| 949 | L2        |   |    |
| 949 | L3        |   |    |
| 949 | MD        |   |    |
| 949 | S0        |   |    |
| 949 | rad.diff. |   |    |
| 951 | FA        | 2 | 95 |
| 951 | L1        |   |    |
| 951 | L2        |   |    |
| 951 | L3        |   |    |
| 951 | MD        |   |    |
| 951 | S0        |   |    |
| 951 | rad.diff. |   |    |
| 952 | FA        | 2 | 90 |
| 952 | L1        |   |    |
| 952 | L2        |   |    |
| 952 | L3        |   |    |
| 952 | MD        |   |    |
| 952 | S0        |   |    |
| 952 | rad.diff. |   |    |
| 954 | FA        | 1 | 65 |
| 954 | L1        |   |    |
| 954 | L2        |   |    |
| 954 | L3        |   |    |
| 954 | MD        |   |    |
| 954 | S0        |   |    |
| 954 | rad.diff. |   |    |
| 956 | FA        | 2 | 73 |
| 956 | L1        |   |    |
| 956 | L2        |   |    |
| 956 | L3        |   |    |
| 956 | MD        |   |    |
| 956 | S0        |   |    |
| 956 | rad.diff. |   |    |

---

\*Lesion size: 1= lacunar infarction, 2=< 1/3 of media territory, 3



|         |   |   |    |
|---------|---|---|----|
| 2:09:00 | 1 | 4 | 17 |
| 2:09:00 | 1 | 4 |    |
| 2:09:00 | 1 | 4 |    |
| 2:09:00 | 1 | 4 |    |
| 2:09:00 | 1 | 4 |    |
| 2:09:00 | 1 | 4 |    |
| 2:09:00 | 1 | 4 |    |
| 2:03:00 | 2 | 2 | 16 |
| 2:03:00 | 2 | 2 |    |
| 2:03:00 | 2 | 2 |    |
| 2:03:00 | 2 | 2 |    |
| 2:03:00 | 2 | 2 |    |
| 2:03:00 | 2 | 2 |    |
| 2:03:00 | 2 | 2 |    |
| 3:10:00 | 2 | 2 | 1  |
| 3:10:00 | 2 | 2 |    |
| 3:10:00 | 2 | 2 |    |
| 3:10:00 | 2 | 2 |    |
| 3:10:00 | 2 | 2 |    |
| 3:10:00 | 2 | 2 |    |
| 3:10:00 | 2 | 2 |    |
| 4:30:00 | 2 | 2 | 17 |
| 4:30:00 | 2 | 2 |    |
| 4:30:00 | 2 | 2 |    |
| 4:30:00 | 2 | 2 |    |
| 4:30:00 | 2 | 2 |    |
| 4:30:00 | 2 | 2 |    |
| 4:30:00 | 2 | 2 |    |
| 2:41:00 | 1 | 1 | 6  |
| 2:41:00 | 1 | 1 |    |
| 2:41:00 | 1 | 1 |    |
| 2:41:00 | 1 | 1 |    |
| 2:41:00 | 1 | 1 |    |
| 2:41:00 | 1 | 1 |    |
| 2:41:00 | 1 | 1 |    |
| 1:54:00 | 2 | 2 | 5  |
| 1:54:00 | 2 | 2 |    |
| 1:54:00 | 2 | 2 |    |
| 1:54:00 | 2 | 2 |    |
| 1:54:00 | 2 | 2 |    |
| 1:54:00 | 2 | 2 |    |
| 1:54:00 | 2 | 2 |    |
| 5:46:00 | 1 | 2 | 4  |
| 5:46:00 | 1 | 2 |    |
| 5:46:00 | 1 | 2 |    |
| 5:46:00 | 1 | 2 |    |
| 5:46:00 | 1 | 2 |    |
| 5:46:00 | 1 | 2 |    |
| 1:25:00 | 1 | 3 | 18 |

|         |   |   |    |
|---------|---|---|----|
| 1:25:00 | 1 | 3 |    |
| 1:25:00 | 1 | 3 |    |
| 1:25:00 | 1 | 3 |    |
| 1:25:00 | 1 | 3 |    |
| 1:25:00 | 1 | 3 |    |
| 1:25:00 | 1 | 3 |    |
| 4:44:00 | 1 | 3 | 14 |
| 4:44:00 | 1 | 3 |    |
| 4:44:00 | 1 | 3 |    |
| 4:44:00 | 1 | 3 |    |
| 4:44:00 | 1 | 3 |    |
| 4:44:00 | 1 | 3 |    |
| 4:44:00 | 1 | 3 |    |
| 5:21:00 | 2 | 3 | 11 |
| 5:21:00 | 2 | 3 |    |
| 5:21:00 | 2 | 3 |    |
| 5:21:00 | 2 | 3 |    |
| 5:21:00 | 2 | 3 |    |
| 5:21:00 | 2 | 3 |    |
| 5:21:00 | 2 | 3 |    |
| 1:55:00 | 1 | 2 | 2  |
| 1:55:00 | 1 | 2 |    |
| 1:55:00 | 1 | 2 |    |
| 1:55:00 | 1 | 2 |    |
| 1:55:00 | 1 | 2 |    |
| 1:55:00 | 1 | 2 |    |
| 5:44:00 | 2 | 2 | 4  |
| 5:44:00 | 2 | 2 |    |
| 5:44:00 | 2 | 2 |    |
| 5:44:00 | 2 | 2 |    |
| 5:44:00 | 2 | 2 |    |
| 5:44:00 | 2 | 2 |    |
| 5:44:00 | 2 | 2 |    |
| 1:11:00 | 1 | 4 | 22 |
| 1:11:00 | 1 | 4 |    |
| 1:11:00 | 1 | 4 |    |
| 1:11:00 | 1 | 4 |    |
| 1:11:00 | 1 | 4 |    |
| 1:11:00 | 1 | 4 |    |
| 1:11:00 | 1 | 4 |    |
| 1:46:00 | 2 | 1 | 6  |
| 1:46:00 | 2 | 1 |    |
| 1:46:00 | 2 | 1 |    |
| 1:46:00 | 2 | 1 |    |
| 1:46:00 | 2 | 1 |    |
| 1:46:00 | 2 | 1 |    |
| 1:46:00 | 2 | 1 |    |
| 1:14:00 | 2 | 3 | 4  |
| 1:14:00 | 2 | 3 |    |

|         |   |   |    |
|---------|---|---|----|
| 1:14:00 | 2 | 3 |    |
| 1:14:00 | 2 | 3 |    |
| 1:14:00 | 2 | 3 |    |
| 1:14:00 | 2 | 3 |    |
| 1:14:00 | 2 | 3 |    |
| 2:17:00 | 2 | 4 | 20 |
| 2:17:00 | 2 | 4 |    |
| 2:17:00 | 2 | 4 |    |
| 2:17:00 | 2 | 4 |    |
| 2:17:00 | 2 | 4 |    |
| 2:17:00 | 2 | 4 |    |
| 2:17:00 | 2 | 4 |    |
| 2:52:00 | 1 | 2 | 21 |
| 2:52:00 | 1 | 2 |    |
| 2:52:00 | 1 | 2 |    |
| 2:52:00 | 1 | 2 |    |
| 2:52:00 | 1 | 2 |    |
| 2:52:00 | 1 | 2 |    |
| 2:01:00 | 1 | 2 | 6  |
| 2:01:00 | 1 | 2 |    |
| 2:01:00 | 1 | 2 |    |
| 2:01:00 | 1 | 2 |    |
| 2:01:00 | 1 | 2 |    |
| 2:01:00 | 1 | 2 |    |
| 2:01:00 | 1 | 2 |    |
| 3:08:00 | 2 | 4 | 8  |
| 3:08:00 | 2 | 4 |    |
| 3:08:00 | 2 | 4 |    |
| 3:08:00 | 2 | 4 |    |
| 3:08:00 | 2 | 4 |    |
| 3:08:00 | 2 | 4 |    |
| 3:08:00 | 2 | 4 |    |
| 2:38:00 | 1 | 4 | 22 |
| 2:38:00 | 1 | 4 |    |
| 2:38:00 | 1 | 4 |    |
| 2:38:00 | 1 | 4 |    |
| 2:38:00 | 1 | 4 |    |
| 2:38:00 | 1 | 4 |    |
| 2:38:00 | 1 | 4 |    |
| 1:02:00 | 1 | 3 | 20 |
| 1:02:00 | 1 | 3 |    |
| 1:02:00 | 1 | 3 |    |
| 1:02:00 | 1 | 3 |    |
| 1:02:00 | 1 | 3 |    |
| 1:02:00 | 1 | 3 |    |
| 1:02:00 | 1 | 3 |    |
| 1:22:00 | 1 | 2 | 3  |
| 1:22:00 | 1 | 2 |    |
| 1:22:00 | 1 | 2 |    |

|         |   |   |    |
|---------|---|---|----|
| 1:22:00 | 1 | 2 |    |
| 1:22:00 | 1 | 2 |    |
| 1:22:00 | 1 | 2 |    |
| 1:22:00 | 1 | 2 |    |
| 0:44:00 | 1 | 2 | 3  |
| 0:44:00 | 1 | 2 |    |
| 0:44:00 | 1 | 2 |    |
| 0:44:00 | 1 | 2 |    |
| 0:44:00 | 1 | 2 |    |
| 0:44:00 | 1 | 2 |    |
| 0:44:00 | 1 | 2 |    |
| 1:42:00 | 2 | 2 | 18 |
| 1:42:00 | 2 | 2 |    |
| 1:42:00 | 2 | 2 |    |
| 1:42:00 | 2 | 2 |    |
| 1:42:00 | 2 | 2 |    |
| 1:42:00 | 2 | 2 |    |
| 1:42:00 | 2 | 2 |    |
| 2:23:00 | 2 | 2 | 4  |
| 2:23:00 | 2 | 2 |    |
| 2:23:00 | 2 | 2 |    |
| 2:23:00 | 2 | 2 |    |
| 2:23:00 | 2 | 2 |    |
| 2:23:00 | 2 | 2 |    |
| 2:23:00 | 2 | 2 |    |
| 0:21:00 | 1 | 4 | 19 |
| 0:21:00 | 1 | 4 |    |
| 0:21:00 | 1 | 4 |    |
| 0:21:00 | 1 | 4 |    |
| 0:21:00 | 1 | 4 |    |
| 0:21:00 | 1 | 4 |    |
| 0:21:00 | 1 | 4 |    |
| 4:09:00 | 1 | 2 | 9  |
| 4:09:00 | 1 | 2 |    |
| 4:09:00 | 1 | 2 |    |
| 4:09:00 | 1 | 2 |    |
| 4:09:00 | 1 | 2 |    |
| 4:09:00 | 1 | 2 |    |
| 4:06:00 | 1 | 2 | 4  |
| 4:06:00 | 1 | 2 |    |
| 4:06:00 | 1 | 2 |    |
| 4:06:00 | 1 | 2 |    |
| 4:06:00 | 1 | 2 |    |
| 4:06:00 | 1 | 2 |    |
| 4:06:00 | 1 | 2 |    |
| 1:47:00 | 1 | 1 | 12 |
| 1:47:00 | 1 | 1 |    |
| 1:47:00 | 1 | 1 |    |
| 1:47:00 | 1 | 1 |    |

|         |   |   |    |
|---------|---|---|----|
| 1:47:00 | 1 | 1 |    |
| 1:47:00 | 1 | 1 |    |
| 1:47:00 | 1 | 1 |    |
| 3:14:00 | 1 | 4 | 20 |
| 3:14:00 | 1 | 4 |    |
| 3:14:00 | 1 | 4 |    |
| 3:14:00 | 1 | 4 |    |
| 3:14:00 | 1 | 4 |    |
| 3:14:00 | 1 | 4 |    |
| 3:14:00 | 1 | 4 |    |
| 3:45:00 | 1 | 1 | 5  |
| 3:45:00 | 1 | 1 |    |
| 3:45:00 | 1 | 1 |    |
| 3:45:00 | 1 | 1 |    |
| 3:45:00 | 1 | 1 |    |
| 3:45:00 | 1 | 1 |    |
| 3:45:00 | 1 | 1 |    |
| 3:45:00 | 1 | 1 |    |
| 2:41:00 | 2 | 3 | 7  |
| 2:41:00 | 2 | 3 |    |
| 2:41:00 | 2 | 3 |    |
| 2:41:00 | 2 | 3 |    |
| 2:41:00 | 2 | 3 |    |
| 2:41:00 | 2 | 3 |    |
| 2:41:00 | 2 | 3 |    |
| 1:17:00 | 1 | 2 | 8  |
| 1:17:00 | 1 | 2 |    |
| 1:17:00 | 1 | 2 |    |
| 1:17:00 | 1 | 2 |    |
| 1:17:00 | 1 | 2 |    |
| 1:17:00 | 1 | 2 |    |
| 1:17:00 | 1 | 2 |    |
| 1:26:00 | 1 | 2 | 3  |
| 1:26:00 | 1 | 2 |    |
| 1:26:00 | 1 | 2 |    |
| 1:26:00 | 1 | 2 |    |
| 1:26:00 | 1 | 2 |    |
| 1:26:00 | 1 | 2 |    |
| 3:15:00 | 1 | 1 | 4  |
| 3:15:00 | 1 | 1 |    |
| 3:15:00 | 1 | 1 |    |
| 3:15:00 | 1 | 1 |    |
| 3:15:00 | 1 | 1 |    |
| 3:15:00 | 1 | 1 |    |
| 3:15:00 | 1 | 1 |    |
| 2:00:00 | 1 | 1 | 5  |
| 2:00:00 | 1 | 1 |    |
| 2:00:00 | 1 | 1 |    |
| 2:00:00 | 1 | 1 |    |
| 2:00:00 | 1 | 1 |    |

|         |   |   |    |
|---------|---|---|----|
| 2:00:00 | 1 | 1 |    |
| 2:00:00 | 1 | 1 |    |
| 3:32:00 | 2 | 3 | 16 |
| 3:32:00 | 2 | 3 |    |
| 3:32:00 | 2 | 3 |    |
| 3:32:00 | 2 | 3 |    |
| 3:32:00 | 2 | 3 |    |
| 3:32:00 | 2 | 3 |    |
| 3:32:00 | 2 | 3 |    |
| 1:49:00 | 1 | 2 | 26 |
| 1:49:00 | 1 | 2 |    |
| 1:49:00 | 1 | 2 |    |
| 1:49:00 | 1 | 2 |    |
| 1:49:00 | 1 | 2 |    |
| 1:49:00 | 1 | 2 |    |
| 1:49:00 | 1 | 2 |    |
| 7:25:00 | 2 | 4 | 27 |
| 7:25:00 | 2 | 4 |    |
| 7:25:00 | 2 | 4 |    |
| 7:25:00 | 2 | 4 |    |
| 7:25:00 | 2 | 4 |    |
| 7:25:00 | 2 | 4 |    |
| 7:25:00 | 2 | 4 |    |
| 1:02:00 | 1 | 1 | 4  |
| 1:02:00 | 1 | 1 |    |
| 1:02:00 | 1 | 1 |    |
| 1:02:00 | 1 | 1 |    |
| 1:02:00 | 1 | 1 |    |
| 1:02:00 | 1 | 1 |    |
| 1:02:00 | 1 | 1 |    |
| 0:52:00 | 2 | 2 | 9  |
| 0:52:00 | 2 | 2 |    |
| 0:52:00 | 2 | 2 |    |
| 0:52:00 | 2 | 2 |    |
| 0:52:00 | 2 | 2 |    |
| 0:52:00 | 2 | 2 |    |
| 0:52:00 | 2 | 2 |    |
| 1:34:00 | 2 | 3 | 11 |
| 1:34:00 | 2 | 3 |    |
| 1:34:00 | 2 | 3 |    |
| 1:34:00 | 2 | 3 |    |
| 1:34:00 | 2 | 3 |    |
| 1:34:00 | 2 | 3 |    |
| 1:31:00 | 2 | 1 | 7  |
| 1:31:00 | 2 | 1 |    |
| 1:31:00 | 2 | 1 |    |
| 1:31:00 | 2 | 1 |    |
| 1:31:00 | 2 | 1 |    |
| 1:31:00 | 2 | 1 |    |





|         |   |   |    |
|---------|---|---|----|
| 3:58:00 | 2 | 1 | 6  |
| 3:58:00 | 2 | 1 |    |
| 3:58:00 | 2 | 1 |    |
| 3:58:00 | 2 | 1 |    |
| 3:58:00 | 2 | 1 |    |
| 3:58:00 | 2 | 1 |    |
| 3:58:00 | 2 | 1 |    |
| 1:24:00 | 2 | 2 | 12 |
| 1:24:00 | 2 | 2 |    |
| 1:24:00 | 2 | 2 |    |
| 1:24:00 | 2 | 2 |    |
| 1:24:00 | 2 | 2 |    |
| 1:24:00 | 2 | 2 |    |
| 1:24:00 | 2 | 2 |    |
| 1:00:00 | 1 | 2 | 17 |
| 1:00:00 | 1 | 2 |    |
| 1:00:00 | 1 | 2 |    |
| 1:00:00 | 1 | 2 |    |
| 1:00:00 | 1 | 2 |    |
| 1:00:00 | 1 | 2 |    |
| 1:00:00 | 1 | 2 |    |
| 3:06:00 | 2 | 1 | 4  |
| 3:06:00 | 2 | 1 |    |
| 3:06:00 | 2 | 1 |    |
| 3:06:00 | 2 | 1 |    |
| 3:06:00 | 2 | 1 |    |
| 3:06:00 | 2 | 1 |    |
| 1:29:00 | 1 | 3 | 16 |
| 1:29:00 | 1 | 3 |    |
| 1:29:00 | 1 | 3 |    |
| 1:29:00 | 1 | 3 |    |
| 1:29:00 | 1 | 3 |    |
| 1:29:00 | 1 | 3 |    |
| 1:29:00 | 1 | 3 |    |
| 0:16:00 | 2 | 2 | 10 |
| 0:16:00 | 2 | 2 |    |
| 0:16:00 | 2 | 2 |    |
| 0:16:00 | 2 | 2 |    |
| 0:16:00 | 2 | 2 |    |
| 0:16:00 | 2 | 2 |    |
| 0:16:00 | 2 | 2 |    |

---

1=1/3 to 2/3 of media territory, 4=> 2/3 of media territory.

| <u>systolic blood pressure [mmHg]</u> | <u>blood glucose [mg/dl]</u> | <u>hematocrit [%]</u> |
|---------------------------------------|------------------------------|-----------------------|
| 126                                   | 111,724                      | 43                    |
| 140                                   | 99,0199                      | 41                    |
| 120                                   |                              | 41                    |
| 167                                   | 100,7318                     | 42                    |
| 130                                   | 98,5694                      |                       |
| 140                                   | 99,11                        | 33                    |
| 120                                   | 124,338                      |                       |

|     |          |    |
|-----|----------|----|
| 140 | 158,576  |    |
| 153 | 148,1244 |    |
| 107 | 114,2468 | 36 |
| 202 | 134,0688 | 45 |
| 125 | 119,4726 | 45 |
| 119 | 123,437  |    |
| 140 | 85,7752  | 35 |
| 135 | 244,3512 | 43 |

|     |         |    |
|-----|---------|----|
| 150 | 150,467 | 46 |
|-----|---------|----|

|     |        |  |
|-----|--------|--|
| 130 | 108,12 |  |
|-----|--------|--|

|     |          |    |
|-----|----------|----|
| 179 | 100,1912 | 39 |
|-----|----------|----|

|     |          |    |
|-----|----------|----|
| 120 | 102,3536 | 46 |
|-----|----------|----|

|     |        |  |
|-----|--------|--|
| 150 | 126,14 |  |
|-----|--------|--|

|     |          |    |
|-----|----------|----|
| 218 | 100,5516 | 46 |
|-----|----------|----|

|     |        |  |
|-----|--------|--|
| 145 | 126,14 |  |
|-----|--------|--|

|     |         |    |
|-----|---------|----|
| 196 | 97,8486 | 44 |
|-----|---------|----|

|     |        |    |
|-----|--------|----|
| 160 | 97,308 | 37 |
|-----|--------|----|

|     |        |    |
|-----|--------|----|
| 126 | 108,12 | 37 |
|-----|--------|----|

|     |        |  |
|-----|--------|--|
| 145 | 108,12 |  |
|-----|--------|--|

|     |          |    |
|-----|----------|----|
| 171 | 145,7818 | 46 |
|-----|----------|----|

|     |        |  |
|-----|--------|--|
| 130 | 108,12 |  |
|-----|--------|--|

|     |     |      |
|-----|-----|------|
| 174 | 110 | 40,3 |
|-----|-----|------|

|     |     |      |
|-----|-----|------|
| 160 | 109 | 44,2 |
|-----|-----|------|

|     |     |      |
|-----|-----|------|
| 142 | 131 | 33,3 |
|-----|-----|------|

|     |    |      |
|-----|----|------|
| 146 | 88 | 43,1 |
|-----|----|------|

|  |     |      |
|--|-----|------|
|  | 100 | 45,3 |
|--|-----|------|

|     |    |      |
|-----|----|------|
| 140 | 92 | 26,6 |
|-----|----|------|

|     |     |      |
|-----|-----|------|
| 190 | 113 | 46,1 |
|-----|-----|------|

|     |     |      |
|-----|-----|------|
| 117 | 111 | 37,5 |
|-----|-----|------|

|     |     |      |
|-----|-----|------|
| 188 | 144 | 39,7 |
|-----|-----|------|

|     |     |      |
|-----|-----|------|
| 201 | 224 | 37,6 |
|-----|-----|------|

|     |     |      |
|-----|-----|------|
| 182 | 115 | 34,2 |
|-----|-----|------|

|     |     |      |
|-----|-----|------|
| 134 | 109 | 38,9 |
|-----|-----|------|

|     |    |      |
|-----|----|------|
| 157 | 81 | 36,8 |
|-----|----|------|

|     |     |      |
|-----|-----|------|
| 181 | 116 | 39,9 |
|-----|-----|------|

|     |    |    |
|-----|----|----|
| 230 | 86 | 48 |
|-----|----|----|



|    |     |      |
|----|-----|------|
| 96 | 126 | 36,8 |
|----|-----|------|

|     |     |      |
|-----|-----|------|
| 128 | 229 | 30,3 |
|-----|-----|------|

|     |     |    |
|-----|-----|----|
| 159 | 126 | 36 |
|-----|-----|----|

|     |     |      |
|-----|-----|------|
| 192 | 105 | 44,4 |
|-----|-----|------|

|     |     |      |
|-----|-----|------|
| 158 | 193 | 41,9 |
|-----|-----|------|

|     |     |      |
|-----|-----|------|
| 139 | 114 | 42,2 |
|-----|-----|------|

|     |     |      |
|-----|-----|------|
| 163 | 117 | 33,5 |
|-----|-----|------|

|     |     |      |
|-----|-----|------|
| 155 | 129 | 41,6 |
|-----|-----|------|

|     |     |      |
|-----|-----|------|
| 133 | 110 | 38,8 |
|-----|-----|------|

|     |     |      |
|-----|-----|------|
| 155 | 138 | 35,3 |
|-----|-----|------|

|     |     |      |
|-----|-----|------|
| 147 | 143 | 36,4 |
|-----|-----|------|

|     |     |      |
|-----|-----|------|
| 136 | 101 | 44,2 |
|-----|-----|------|

|     |     |      |
|-----|-----|------|
| 161 | 193 | 25,8 |
|-----|-----|------|

|     |     |      |
|-----|-----|------|
| 116 | 101 | 26,5 |
|-----|-----|------|

|     |     |      |
|-----|-----|------|
| 178 | 141 | 42,7 |
|-----|-----|------|

|     |  |      |
|-----|--|------|
| 165 |  | 31,2 |
|-----|--|------|

|     |    |      |
|-----|----|------|
| 127 | 89 | 30,3 |
|-----|----|------|

|     |     |      |
|-----|-----|------|
| 155 | 136 | 41,5 |
|-----|-----|------|

|     |     |      |
|-----|-----|------|
| 166 | 174 | 40,2 |
|-----|-----|------|

|     |  |    |
|-----|--|----|
| 159 |  | 34 |
|-----|--|----|

---

| leucocyte count [*109/l] | plateled count [*109/l] | value_infarct lesion | value_contralateral |
|--------------------------|-------------------------|----------------------|---------------------|
| 10,43                    | 257                     | 0,294629             | 0,313145            |
|                          |                         | 0,000823             | 0,001131            |
|                          |                         | 0,000604             | 0,0008              |
|                          |                         | 0,000455             | 0,00061             |
|                          |                         | 0,000627             | 0,000847            |
|                          |                         | 244,06558            | 220,091933          |
| 7,9                      | 248                     | 0,0005295            | 0,000705            |
|                          |                         | 0,250608             | 0,263807            |
|                          |                         | 0,000704             | 0,000957            |
|                          |                         | 0,000536             | 0,000722            |
|                          |                         | 0,000432             | 0,000579            |
|                          |                         | 0,000557             | 0,000753            |
| 7,7                      | 311                     | 255,060054           | 213,224804          |
|                          |                         | 0,000484             | 0,0006505           |
|                          |                         | 0,2163               | 0,235733            |
|                          |                         | 0,000801             | 0,001076            |
|                          |                         | 0,000628             | 0,000846            |
|                          |                         | 0,000519             | 0,000686            |
| 6                        | 234                     | 0,000649             | 0,000869            |
|                          |                         | 312,684799           | 301,795182          |
|                          |                         | 0,0005735            | 0,000766            |
|                          |                         | 0,274944             | 0,246542            |
|                          |                         | 0,000699             | 0,000977            |
|                          |                         | 0,000533             | 0,000753            |
| 7,38                     | 180                     | 0,000413             | 0,000612            |
|                          |                         | 0,000548             | 0,000781            |
|                          |                         | 189,197535           | 176,52011           |
|                          |                         | 0,000473             | 0,0006825           |
|                          |                         | 0,263807             | 0,292291            |
|                          |                         | 0,000873             | 0,001055            |
| 7                        | 150                     | 0,000671             | 0,000763            |
|                          |                         | 0,000529             | 0,000613            |
|                          |                         | 0,000691             | 0,00081             |
|                          |                         | 227,340376           | 219,060809          |
|                          |                         | 0,0006               | 0,000688            |
|                          |                         | 0,501261             | 0,514882            |
| 6,73                     | 160                     | 0,00091              | 0,001119            |
|                          |                         | 0,000467             | 0,000567            |
|                          |                         | 0,00031              | 0,000386            |
|                          |                         | 0,000562             | 0,00069             |
|                          |                         | 203,326425           | 194,989337          |
|                          |                         | 0,0003885            | 0,0004765           |
|                          |                         | 0,337311             | 0,320901            |
|                          |                         | 0,000673             | 0,001048            |
|                          |                         | 0,000469             | 0,000742            |
|                          |                         | 0,000342             | 0,000571            |
|                          |                         | 0,000495             | 0,000787            |
|                          |                         | 233,847921           | 221,989218          |
|                          |                         | 0,0004055            | 0,0006565           |

|       |     |            |            |
|-------|-----|------------|------------|
| 12,8  | 235 | 0,261846   | 0,2444     |
|       |     | 0,000719   | 0,001053   |
|       |     | 0,000561   | 0,000817   |
|       |     | 0,000449   | 0,000657   |
|       |     | 0,000576   | 0,000842   |
|       |     | 309,617613 | 280,445917 |
|       |     | 0,000505   | 0,000737   |
| 10,9  | 247 | 0,352337   | 0,384951   |
|       |     | 0,000818   | 0,000977   |
|       |     | 0,000582   | 0,000691   |
|       |     | 0,000393   | 0,00043    |
|       |     | 0,000598   | 0,000699   |
|       |     | 234,349493 | 213,935263 |
|       |     | 0,0004875  | 0,0005605  |
| 10,7  | 279 | 0,189913   | 0,128682   |
|       |     | 0,000862   | 0,000924   |
|       |     | 0,000686   | 0,000798   |
|       |     | 0,000596   | 0,000722   |
|       |     | 0,000715   | 0,000815   |
|       |     | 273,547042 | 274,285562 |
|       |     | 0,000641   | 0,00076    |
| 20,61 | 582 | 0,27723    | 0,300491   |
|       |     | 0,000815   | 0,001124   |
|       |     | 0,000581   | 0,00078    |
|       |     | 0,000471   | 0,000629   |
|       |     | 0,000622   | 0,000845   |
|       |     | 299,063049 | 270,266553 |
|       |     | 0,000526   | 0,0007045  |
| 12,3  | 304 | 0,168662   | 0,201205   |
|       |     | 0,001129   | 0,001168   |
|       |     | 0,000955   | 0,000958   |
|       |     | 0,000814   | 0,000789   |
|       |     | 0,000966   | 0,000972   |
|       |     | 366,727179 | 370,19948  |
|       |     | 0,0008845  | 0,0008735  |
| 17    | 335 | 0,296199   | 0,291927   |
|       |     | 0,000719   | 0,000875   |
|       |     | 0,000517   | 0,000643   |
|       |     | 0,000391   | 0,000491   |
|       |     | 0,000543   | 0,00067    |
|       |     | 262,318924 | 246,656674 |
|       |     | 0,000454   | 0,000567   |
| 12    | 709 | 0,262756   | 0,215131   |
|       |     | 0,000734   | 0,000956   |
|       |     | 0,000555   | 0,000775   |
|       |     | 0,000444   | 0,000619   |
|       |     | 0,000575   | 0,000782   |
|       |     | 196,964268 | 192,875134 |
|       |     | 0,0004995  | 0,000697   |
| 9,53  | 248 | 0,17652    | 0,176699   |

|       |     |            |            |
|-------|-----|------------|------------|
|       |     | 0,000681   | 0,000963   |
|       |     | 0,000572   | 0,000798   |
|       |     | 0,000502   | 0,000698   |
|       |     | 0,000585   | 0,00082    |
|       |     | 251,184179 | 271,185494 |
| 8,6   | 271 | 0,000537   | 0,000748   |
|       |     | 0,198011   | 0,190072   |
|       |     | 0,000711   | 0,000983   |
|       |     | 0,000578   | 0,000804   |
|       |     | 0,000496   | 0,000692   |
|       |     | 0,000595   | 0,000827   |
|       |     | 245,095501 | 254,264179 |
| 6     | 230 | 0,000537   | 0,000748   |
|       |     | 0,344165   | 0,336033   |
|       |     | 0,000816   | 0,000951   |
|       |     | 0,000548   | 0,000645   |
|       |     | 0,000407   | 0,00048    |
|       |     | 0,000591   | 0,000692   |
|       |     | 259,573841 | 235,426039 |
| 4,37  | 419 | 0,0004775  | 0,0005625  |
|       |     | 0,297351   | 0,306311   |
|       |     | 0,000799   | 0,000947   |
|       |     | 0,000579   | 0,000657   |
|       |     | 0,000438   | 0,000522   |
|       |     | 0,000605   | 0,000709   |
|       |     | 272,528832 | 273,737046 |
| 10,29 | 254 | 0,0005085  | 0,0005895  |
|       |     | 0,36994    | 0,34073    |
|       |     | 0,000744   | 0,000929   |
|       |     | 0,0005     | 0,000635   |
|       |     | 0,000349   | 0,000461   |
|       |     | 0,000531   | 0,000675   |
|       |     | 265,280307 | 222,220254 |
| 7     | 200 | 0,0004245  | 0,000548   |
|       |     | 0,246374   | 0,257682   |
|       |     | 0,000741   | 0,001101   |
|       |     | 0,00056    | 0,000818   |
|       |     | 0,00046    | 0,000673   |
|       |     | 0,000587   | 0,000864   |
|       |     | 267,829287 | 274,386531 |
| 9,63  | 292 | 0,00051    | 0,0007455  |
|       |     | 0,401974   | 0,353224   |
|       |     | 0,000952   | 0,001061   |
|       |     | 0,000554   | 0,000661   |
|       |     | 0,000433   | 0,000538   |
|       |     | 0,000646   | 0,000754   |
|       |     | 254,718643 | 247,506773 |
| 7     | 190 | 0,0004935  | 0,0005995  |
|       |     | 0,232907   | 0,24617    |
|       |     | 0,000862   | 0,000927   |

|      |     |  |            |            |
|------|-----|--|------------|------------|
|      |     |  | 0,000648   | 0,000702   |
|      |     |  | 0,00054    | 0,000563   |
|      |     |  | 0,000683   | 0,000731   |
|      |     |  | 252,298064 | 222,882108 |
| 13,4 | 237 |  | 0,000594   | 0,0006325  |
|      |     |  | 0,291549   | 0,241652   |
|      |     |  | 0,000726   | 0,001036   |
|      |     |  | 0,000532   | 0,000804   |
|      |     |  | 0,000408   | 0,000651   |
|      |     |  | 0,000556   | 0,00083    |
|      |     |  | 282,268174 | 236,035854 |
| 20,4 | 400 |  | 0,00047    | 0,0007275  |
|      |     |  | 0,251883   | 0,243722   |
|      |     |  | 0,000731   | 0,000953   |
|      |     |  | 0,000575   | 0,000735   |
|      |     |  | 0,000448   | 0,000598   |
|      |     |  | 0,000585   | 0,000762   |
|      |     |  | 263,334541 | 253,698483 |
| 6,45 | 224 |  | 0,0005115  | 0,0006665  |
|      |     |  | 0,231142   | 0,238287   |
|      |     |  | 0,000867   | 0,001012   |
|      |     |  | 0,000673   | 0,000781   |
|      |     |  | 0,000562   | 0,000646   |
|      |     |  | 0,000701   | 0,000813   |
|      |     |  | 272,741388 | 262,247969 |
| 7    | 240 |  | 0,0006175  | 0,0007135  |
|      |     |  | 0,211208   | 0,204646   |
|      |     |  | 0,000726   | 0,000977   |
|      |     |  | 0,000575   | 0,000791   |
|      |     |  | 0,000488   | 0,000669   |
|      |     |  | 0,000596   | 0,000812   |
|      |     |  | 330,85554  | 278,02464  |
| 7,6  | 152 |  | 0,0005315  | 0,00073    |
|      |     |  | 0,19998    | 0,202766   |
|      |     |  | 0,000692   | 0,000967   |
|      |     |  | 0,000565   | 0,000774   |
|      |     |  | 0,000477   | 0,000662   |
|      |     |  | 0,000578   | 0,000801   |
|      |     |  | 267,341497 | 235,273859 |
| 7    | 240 |  | 0,000521   | 0,000718   |
|      |     |  | 0,356437   | 0,332047   |
|      |     |  | 0,000828   | 0,001048   |
|      |     |  | 0,000551   | 0,000688   |
|      |     |  | 0,000414   | 0,000553   |
|      |     |  | 0,000598   | 0,000763   |
|      |     |  | 266,342505 | 264,848265 |
| 10,8 | 318 |  | 0,0004825  | 0,0006205  |
|      |     |  | 0,238896   | 0,273284   |
|      |     |  | 0,000768   | 0,001097   |
|      |     |  | 0,000608   | 0,000822   |

|     |     |  |            |            |
|-----|-----|--|------------|------------|
|     |     |  | 0,000485   | 0,000653   |
|     |     |  | 0,00062    | 0,000857   |
|     |     |  | 343,203706 | 322,746246 |
|     |     |  | 0,0005465  | 0,0007375  |
| 6,3 | 393 |  | 0,260806   | 0,222696   |
|     |     |  | 0,000648   | 0,000994   |
|     |     |  | 0,000504   | 0,000794   |
|     |     |  | 0,000392   | 0,000659   |
|     |     |  | 0,000515   | 0,000816   |
|     |     |  | 286,881801 | 277,475618 |
|     |     |  | 0,000448   | 0,0007265  |
| 2,6 | 221 |  | 0,427614   | 0,413645   |
|     |     |  | 0,000791   | 0,001054   |
|     |     |  | 0,00048    | 0,000648   |
|     |     |  | 0,000324   | 0,000461   |
|     |     |  | 0,000532   | 0,000721   |
|     |     |  | 240,931922 | 247,262396 |
|     |     |  | 0,000402   | 0,0005545  |
| 8,2 | 200 |  | 0,247664   | 0,206532   |
|     |     |  | 0,000807   | 0,001034   |
|     |     |  | 0,000624   | 0,000846   |
|     |     |  | 0,000506   | 0,000707   |
|     |     |  | 0,000646   | 0,000862   |
|     |     |  | 327,405578 | 330,290457 |
|     |     |  | 0,000565   | 0,0007765  |
| 9   | 279 |  | 0,432913   | 0,320186   |
|     |     |  | 0,000948   | 0,001156   |
|     |     |  | 0,000666   | 0,000871   |
|     |     |  | 0,000367   | 0,000599   |
|     |     |  | 0,000659   | 0,000876   |
|     |     |  | 240,297456 | 248,797597 |
|     |     |  | 0,0005165  | 0,000735   |
| 5,7 | 229 |  | 0,40387    | 0,369346   |
|     |     |  | 0,000793   | 0,001122   |
|     |     |  | 0,000556   | 0,0008     |
|     |     |  | 0,000352   | 0,000533   |
|     |     |  | 0,000567   | 0,000818   |
|     |     |  | 237,143529 | 325,624825 |
|     |     |  | 0,000454   | 0,0006665  |
| 7,8 | 273 |  | 0,33116    | 0,305222   |
|     |     |  | 0,000968   | 0,001162   |
|     |     |  | 0,0007     | 0,000846   |
|     |     |  | 0,000493   | 0,000623   |
|     |     |  | 0,00072    | 0,000877   |
|     |     |  | 282,72468  | 292,074792 |
|     |     |  | 0,0005965  | 0,0007345  |
| 4,6 | 212 |  | 0,224719   | 0,184836   |
|     |     |  | 0,000731   | 0,001118   |
|     |     |  | 0,000576   | 0,000947   |
|     |     |  | 0,000473   | 0,000785   |



|      |     |  |            |            |
|------|-----|--|------------|------------|
|      |     |  | 0,000593   | 0,00095    |
|      |     |  | 346,385154 | 366,444624 |
|      |     |  | 0,0005245  | 0,000866   |
| 8,5  | 272 |  | 0,330684   | 0,296544   |
|      |     |  | 0,000649   | 0,000972   |
|      |     |  | 0,000468   | 0,000715   |
|      |     |  | 0,000344   | 0,000555   |
|      |     |  | 0,000487   | 0,000747   |
|      |     |  | 265,718906 | 233,665393 |
|      |     |  | 0,000406   | 0,000635   |
| 5,5  | 179 |  | 0,329809   | 0,321054   |
|      |     |  | 0,00067    | 0,001448   |
|      |     |  | 0,000511   | 0,00103    |
|      |     |  | 0,000353   | 0,000753   |
|      |     |  | 0,000512   | 0,001077   |
|      |     |  | 266,601839 | 275,359051 |
|      |     |  | 0,000432   | 0,0008915  |
| 5,9  | 160 |  | 0,267956   | 0,245997   |
|      |     |  | 0,000785   | 0,001139   |
|      |     |  | 0,000614   | 0,000884   |
|      |     |  | 0,000475   | 0,000719   |
|      |     |  | 0,000624   | 0,000913   |
|      |     |  | 335,370187 | 255,181066 |
|      |     |  | 0,0005445  | 0,0008015  |
| 8,2  | 302 |  | 0,38309    | 0,305515   |
|      |     |  | 0,000814   | 0,001041   |
|      |     |  | 0,000521   | 0,000744   |
|      |     |  | 0,000386   | 0,000566   |
|      |     |  | 0,000573   | 0,000784   |
|      |     |  | 261,844615 | 263,889054 |
|      |     |  | 0,0004535  | 0,000655   |
| 6,7  | 217 |  | 0,299187   | 0,325401   |
|      |     |  | 0,000954   | 0,001326   |
|      |     |  | 0,000682   | 0,000895   |
|      |     |  | 0,000537   | 0,000703   |
|      |     |  | 0,000724   | 0,000975   |
|      |     |  | 395,955529 | 387,932463 |
|      |     |  | 0,0006095  | 0,000799   |
| 10,8 | 300 |  | 0,287912   | 0,330015   |
|      |     |  | 0,000693   | 0,001048   |
|      |     |  | 0,000526   | 0,000747   |
|      |     |  | 0,000385   | 0,000535   |
|      |     |  | 0,000535   | 0,000777   |
|      |     |  | 303,727334 | 263,898091 |
|      |     |  | 0,0004555  | 0,000641   |
| 10,8 | 256 |  | 0,358265   | 0,330551   |
|      |     |  | 0,000575   | 0,001116   |
|      |     |  | 0,000444   | 0,000814   |
|      |     |  | 0,00028    | 0,00058    |
|      |     |  | 0,000419   | 0,000837   |

|      |     |  |            |            |
|------|-----|--|------------|------------|
|      |     |  | 258,826844 | 313,366017 |
|      |     |  | 0,000362   | 0,000697   |
| 11,6 | 108 |  | 0,3329     | 0,27985    |
|      |     |  | 0,000641   | 0,001051   |
|      |     |  | 0,000462   | 0,000787   |
|      |     |  | 0,000331   | 0,00062    |
|      |     |  | 0,000478   | 0,000819   |
|      |     |  | 319,23311  | 282,602814 |
|      |     |  | 0,0003965  | 0,0007035  |
| 7,5  | 480 |  | 0,515734   | 0,50608    |
|      |     |  | 0,00075    | 0,001225   |
|      |     |  | 0,000385   | 0,000613   |
|      |     |  | 0,000256   | 0,000466   |
|      |     |  | 0,000458   | 0,000763   |
|      |     |  | 248,124054 | 260,712948 |
|      |     |  | 0,0003205  | 0,0005395  |
| 12,6 | 280 |  | 0,237925   | 0,223154   |
|      |     |  | 0,000728   | 0,001107   |
|      |     |  | 0,000574   | 0,000895   |
|      |     |  | 0,000462   | 0,000729   |
|      |     |  | 0,000588   | 0,00091    |
|      |     |  | 382,614852 | 322,227076 |
|      |     |  | 0,000518   | 0,000812   |
| 9,4  | 386 |  | 0,329447   | 0,28651    |
|      |     |  | 0,00084    | 0,001033   |
|      |     |  | 0,000603   | 0,000779   |
|      |     |  | 0,00043    | 0,000581   |
|      |     |  | 0,000625   | 0,000798   |
|      |     |  | 319,623989 | 335,006328 |
|      |     |  | 0,0005165  | 0,00068    |
| 6,8  | 196 |  | 0,394642   | 0,335487   |
|      |     |  | 0,000851   | 0,001106   |
|      |     |  | 0,000545   | 0,000754   |
|      |     |  | 0,000383   | 0,000569   |
|      |     |  | 0,000593   | 0,00081    |
|      |     |  | 262,432027 | 261,78882  |
|      |     |  | 0,000464   | 0,0006615  |
| 9    | 266 |  | 0,404568   | 0,358557   |
|      |     |  | 0,00069    | 0,001004   |
|      |     |  | 0,000438   | 0,000661   |
|      |     |  | 0,000306   | 0,000501   |
|      |     |  | 0,000477   | 0,000721   |
|      |     |  | 244,3606   | 239,301338 |
|      |     |  | 0,000372   | 0,000581   |
| 5,2  | 249 |  | 0,432913   | 0,419961   |
|      |     |  | 0,000982   | 0,001168   |
|      |     |  | 0,000566   | 0,000679   |
|      |     |  | 0,000415   | 0,000513   |
|      |     |  | 0,000654   | 0,000787   |
|      |     |  | 295,949202 | 279,839481 |

|      |     |  |            |            |
|------|-----|--|------------|------------|
|      |     |  | 0,0004905  | 0,000596   |
| 9,9  | 380 |  | 0,362933   | 0,361566   |
|      |     |  | 0,0007     | 0,001166   |
|      |     |  | 0,000459   | 0,000747   |
|      |     |  | 0,000347   | 0,000582   |
|      |     |  | 0,000502   | 0,000831   |
|      |     |  | 321,684274 | 290,374069 |
|      |     |  | 0,000403   | 0,0006645  |
| 7,6  | 209 |  | 0,253916   | 0,236714   |
|      |     |  | 0,000696   | 0,001048   |
|      |     |  | 0,000538   | 0,000857   |
|      |     |  | 0,000428   | 0,000673   |
|      |     |  | 0,000554   | 0,000857   |
|      |     |  | 388,98628  | 325,66154  |
|      |     |  | 0,000483   | 0,000765   |
| 6,7  | 242 |  | 0,56046    | 0,519131   |
|      |     |  | 0,001033   | 0,001102   |
|      |     |  | 0,000479   | 0,000529   |
|      |     |  | 0,000305   | 0,000361   |
|      |     |  | 0,000605   | 0,000664   |
|      |     |  | 284,391777 | 261,288797 |
|      |     |  | 0,000392   | 0,000445   |
| 13,7 | 304 |  | 0,417364   | 0,222052   |
|      |     |  | 0,000491   | 0,000995   |
|      |     |  | 0,000363   | 0,000805   |
|      |     |  | 0,000226   | 0,000658   |
|      |     |  | 0,000357   | 0,000819   |
|      |     |  | 345,916358 | 293,488596 |
|      |     |  | 0,0002945  | 0,0007315  |
| 5,9  | 190 |  | 0,381382   | 0,383289   |
|      |     |  | 0,000692   | 0,000955   |
|      |     |  | 0,000458   | 0,000634   |
|      |     |  | 0,000312   | 0,000431   |
|      |     |  | 0,000487   | 0,000674   |
|      |     |  | 253,562259 | 237,569835 |
|      |     |  | 0,000385   | 0,0005325  |
| 9,2  | 233 |  | 0,282291   | 0,269197   |
|      |     |  | 0,000862   | 0,001098   |
|      |     |  | 0,000634   | 0,000797   |
|      |     |  | 0,000501   | 0,000662   |
|      |     |  | 0,000666   | 0,000852   |
|      |     |  | 284,436446 | 272,999781 |
|      |     |  | 0,0005675  | 0,0007295  |
| 8,7  | 433 |  | 0,336035   | 0,2686     |
|      |     |  | 0,000827   | 0,001128   |
|      |     |  | 0,000599   | 0,000861   |
|      |     |  | 0,000421   | 0,000673   |
|      |     |  | 0,000615   | 0,000888   |
|      |     |  | 284,336366 | 283,46919  |
|      |     |  | 0,00051    | 0,000767   |

|      |     |            |            |
|------|-----|------------|------------|
| 8,9  | 247 | 0,420097   | 0,360669   |
|      |     | 0,000782   | 0,001059   |
|      |     | 0,000534   | 0,000698   |
|      |     | 0,000349   | 0,00054    |
|      |     | 0,000554   | 0,000765   |
|      |     | 299,058362 | 297,337552 |
|      |     | 0,0004415  | 0,000619   |
| 14,1 | 133 | 0,342969   | 0,276746   |
|      |     | 0,000771   | 0,001017   |
|      |     | 0,000554   | 0,000772   |
|      |     | 0,000409   | 0,000613   |
|      |     | 0,000578   | 0,0008     |
|      |     | 296,069662 | 305,073956 |
|      |     | 0,0004815  | 0,0006925  |
| 5,1  | 203 | 0,159896   | 0,199371   |
|      |     | 0,001027   | 0,001227   |
|      |     | 0,00089    | 0,000989   |
|      |     | 0,00076    | 0,000835   |
|      |     | 0,000893   | 0,001017   |
|      |     | 401,280192 | 341,36939  |
|      |     | 0,000825   | 0,000912   |
| 7,3  | 267 | 0,366799   | 0,304809   |
|      |     | 0,000876   | 0,001092   |
|      |     | 0,000567   | 0,000789   |
|      |     | 0,000424   | 0,00061    |
|      |     | 0,000623   | 0,00083    |
|      |     | 313,234104 | 325,534096 |
|      |     | 0,0004955  | 0,0006995  |
| 10,7 | 249 | 0,349676   | 0,308454   |
|      |     | 0,000702   | 0,001019   |
|      |     | 0,000479   | 0,000734   |
|      |     | 0,000347   | 0,000565   |
|      |     | 0,000509   | 0,000772   |
|      |     | 265,169408 | 264,742139 |
|      |     | 0,000413   | 0,0006495  |
| 5,3  | 274 | 0,276278   | 0,191156   |
|      |     | 0,000714   | 0,001186   |
|      |     | 0,000539   | 0,000993   |
|      |     | 0,000413   | 0,000827   |
|      |     | 0,000555   | 0,001002   |
|      |     | 406,096516 | 378,122242 |
|      |     | 0,000476   | 0,00091    |

---
